# Supplementary material for: The Seniors’ Outdoor Survey: An Observational Tool for Assessing Outdoor Environments at Long-Term Care Settings
Source: Oxford University Press journal article supplement (doi:10.1093/geront/gnu050), 2014-06-17
Supplement: gnu050_supplementary_data.zip [file gnu050_supplementary_data.zip]

Archive with 1 entries (1 files):
- Appendix_1_SOS_Tool_3_29_14_Anonymous.pdf
